# Supplementary material for: Efficient electrochemomechanical energy conversion in nanochannels grafted with end-charged polyelectrolyte brushes at medium and high salt concentration
Source: Royal Society of Chemistry journal article supplement (doi:10.1039/c8sm00768c), 2018-01-01
Supplement: c8sm00768c1.pdf [file c8sm00768c1.pdf]

## Efficient Electrochemomechanical Energy Conversion in Nanochannels Grafted with End-charged Polyelectrolyte Brushes at Medium and High Salt Concentration – Supporting Information

Guang Chen, Harnoor Singh Sachar, and Siddhartha Das\*

*Department of Mechanical Engineering, University of Maryland, College Park, MD-20742, USA*

(Dated: June 6, 2018)

All the figures for the main paper are provided for a relatively small pressure gradient of  $10^5$  Pa/m. Consequently, the output power is relatively small. As has been discussed in the main paper, increase in pressure causes a quadratic increase in  $P_{out}$ . In Fig. S1, we provide

the variation of  $i_S$ ,  $E_S$ , and  $P_{out}$  for a much enhanced pressure gradient of  $5 \times 10^8$  Pa/m. While there is a distinct increase in magnitude of all the three quantities, the qualitative trend (with respect to the variation with  $c_\infty$  and the relative influence of the presence of the brushes) remains unchanged.

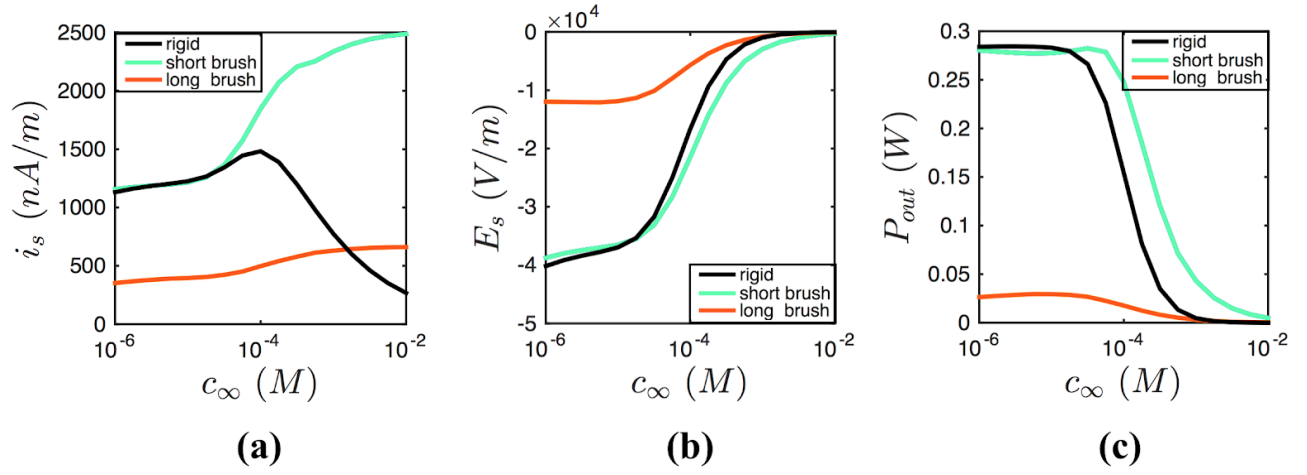

FIG. S1. Variation of (a) Streaming Current, (b) Streaming Potential and (c) Maximum Power output for a pressure gradient of  $5 \times 10^8$  Pa/m. For (a-c), results are shown for Case 1 (brush-free nanochannels; shown in black and referred to as the “rigid” case), Case 2 (brush-grafted nanochannels,  $N = 2000$ ,  $\ell = 80$  nm; shown in green and referred to as “short brush” case), and Case 3 (brush-grafted nanochannels,  $N = 2000$ ,  $\ell = 22$  nm; shown in red and referred to as “long brush” case). All other parameters are identical to that considered in Fig. 9 in the main paper.
